# Supplementary material for: Preparation of keratin/chlorhexidine complex nanoparticles for long-term and dual stimuli-responsive release
Source: Royal Society of Chemistry journal article supplement (doi:10.1039/c5ra16253j), 2015-01-01
Supplement: c5ra16253j1.pdf [file c5ra16253j1.pdf]

**Supplementary Information**

**Preparation of keratin/chlorhexidine complex nanoparticles for long-term  
and dual stimuli-responsive release**

Xuelian Zhi, Yanfang Wang, Pengfei Li, Jiang Yuan\*, Jian Shen\*

Jiangsu Key Laboratory of Biofunctional Materials, College of Chemistry and Materials Science, Nanjing  
Normal University, Nanjing 210023, China

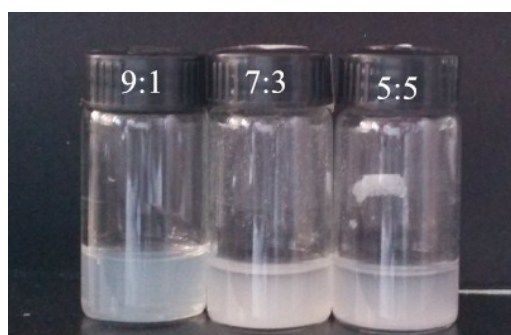

a

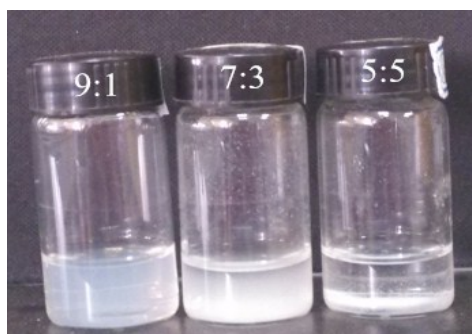

b

Fig. S1 Effect of ratio to keratin and CHX on the stability of KCNPs after 4 h (a) and 14 day (b) standing.

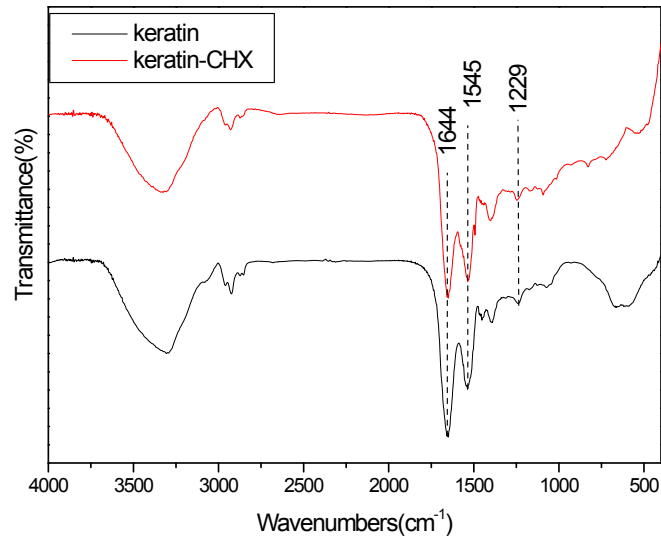

Fig.S2 FT-IR spectra of keratin and KCNPs.

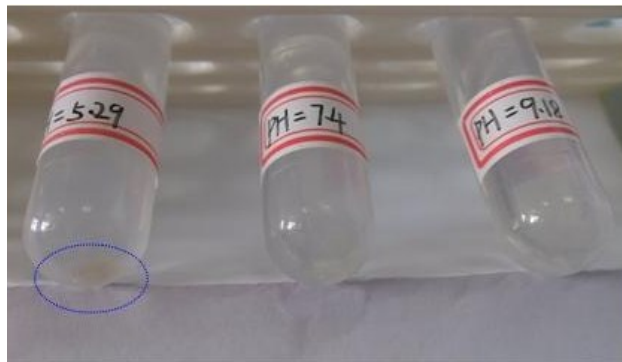

Fig.S3 Effect of pH value on the stability of KCNPs.

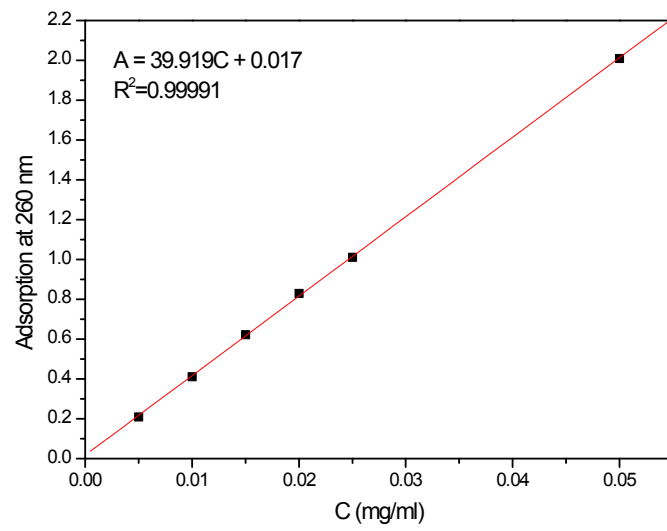

Fig. S4 Standard curve of CHX as a function of concentration at 260 nm.
